# Supplementary material
Source: publisher figshare collection journal article supplement (https://frontiersin.figshare.com/ndownloader/files/31085785)
Supplement: Supplementary file [file 31085785]

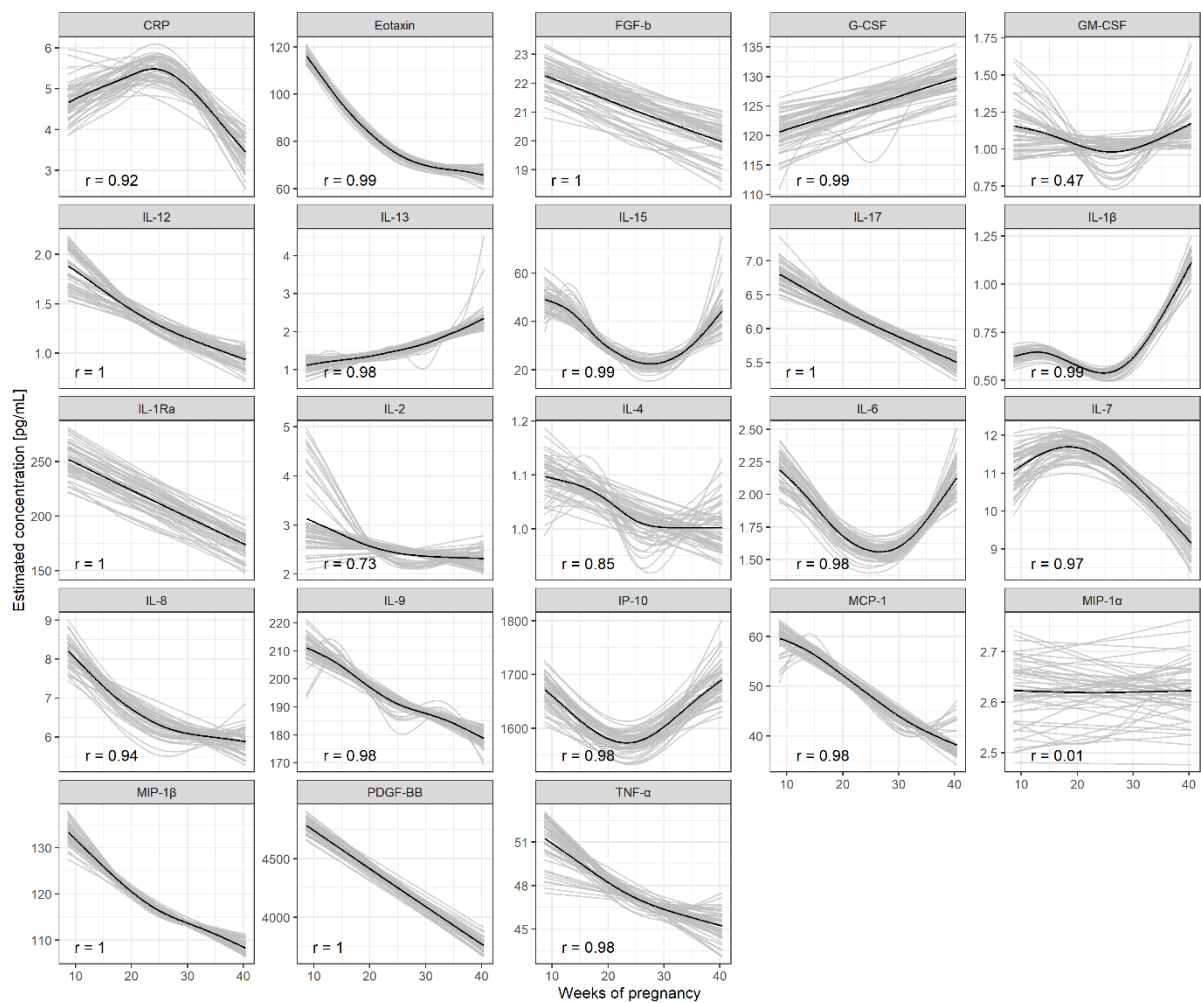

**Supplementary Figure 3. Robustness testing of continuous time trajectories.** Generalized additive mixed models (GAMMs) were built for each cytokine 50 times using 80% of the participants selected at random in each run (grey lines). Spearman's correlation coefficient ( $r$ ) was calculated between each run and the mean value (black line). Cytokines with mean  $r$  equal to or above 0.9 were considered robust and included for continuous analysis. CRP is measured in  $\mu\text{g/mL}$ , cytokines in  $\text{pg/mL}$ .
